# Supplementary material
Source: PubMed Central journal article supplement (PMC7047119)
Supplement: Supp_FigS1.pdf [file Supp_FigS1.pdf]

A.  $TR\alpha^{(+/+)} TR\beta^{(+/+)}$

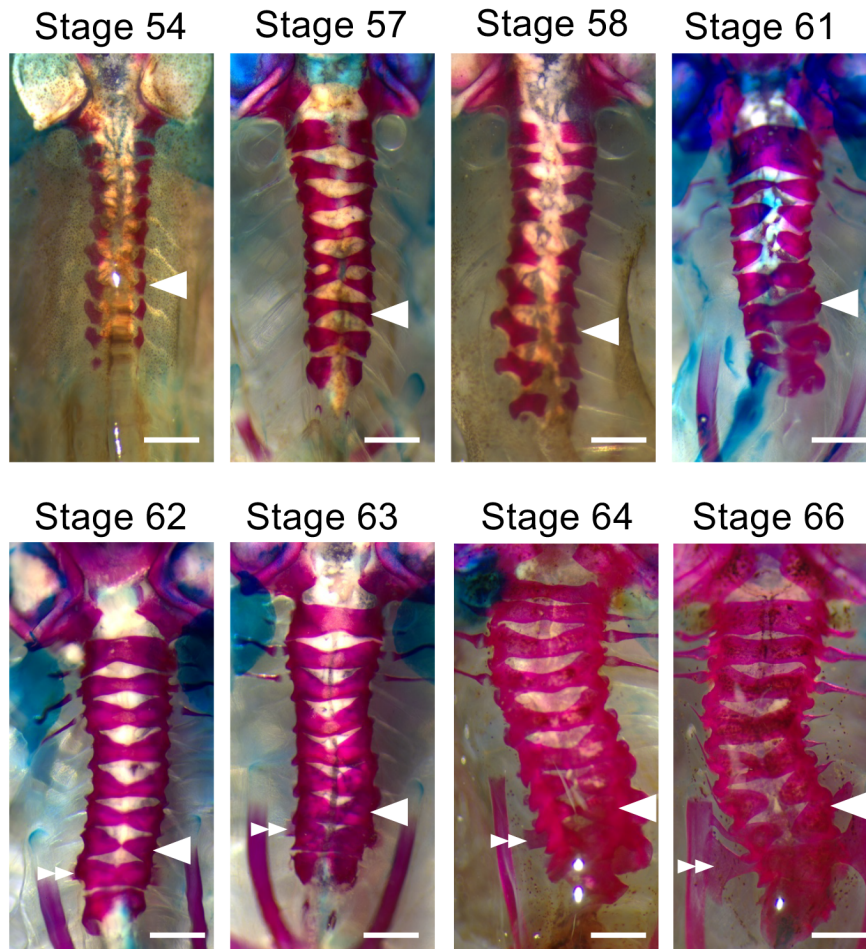

B.  $TR\alpha^{(-/-)} TR\beta^{(-/-)}$

Extra ossified vertebra

Extra ossified vertebrae,  
asymmetric arrangement  
of the sacral vertebra

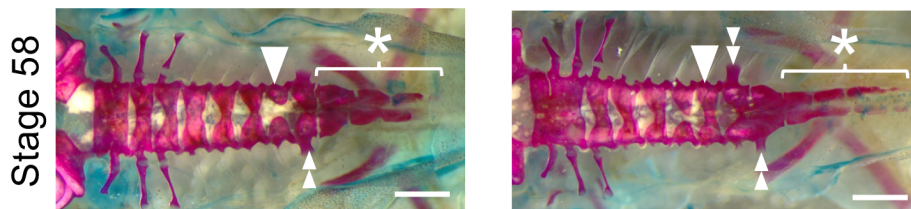

**Supplemental figure 1. Vertebral abnormalities during metamorphosis in  $TR\alpha^{(-/-)}TR\beta^{(-/-)}$  tadpoles.**

**(A). Representative photos of the vertebra development in wild type ( $TR\alpha^{(+/+)}TR\beta^{(+/+)}$ ) tadpoles during metamorphosis.**

Alizarin red (for ossification) and Alcian blue (for cartilages) whole mount staining of tadpoles at stage 54, 57, 58, 61, 62, 63, 64 and 66. Arrowheads: vertebra VIII. Double-arrowheads: Sacral vertebra. Bars: 1 mm.

**(B).  $TR\alpha^{(-/-)}TR\beta^{(-/-)}$  tadpoles have increased ossification, additional ossified vertebrae at the end of the body and the asymmetric arrangement of the sacral vertebra at stage 58.**

Alizarin red (for ossification) and Alcian blue (for cartilages) whole mount staining of  $TR\alpha^{(-/-)}TR\beta^{(-/-)}$  tadpoles at stage 58. Note the extra ossified vertebrae (asterisks) at the body-tail junction. The transverse process of the vertebra II, III and IV were also prematurely ossified, resembling those of the wild type at stages 64-66. In addition, in 4 of the 8 animals examined, there was an asymmetric arrangement of the sacral vertebra (double-arrowheads). Arrowheads: vertebra VIII. Bars: 1 mm.
