# Supplementary material
Source: PubMed Central journal article supplement (PMC7047119)
Supplement: Supp_FigS2.pdf [file Supp_FigS2.pdf]

A.  $TR\alpha^{+/+} TR\beta^{+/+}$   
stage 58

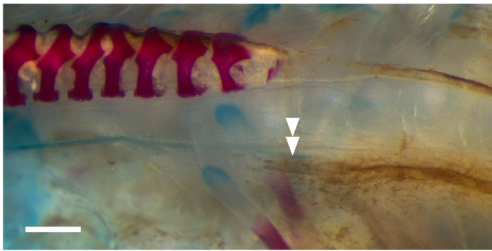

B.  $TR\alpha^{+/+} TR\beta^{+/+}$   
stage 62

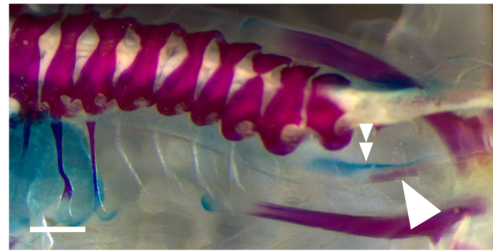

C.  $TR\alpha^{+/+} TR\beta^{+/+}$   
stage 63

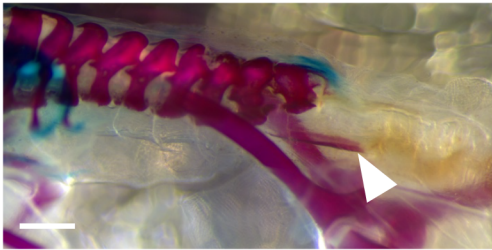

D.  $TR\alpha^{-/-} TR\beta^{-/-}$   
stage 58

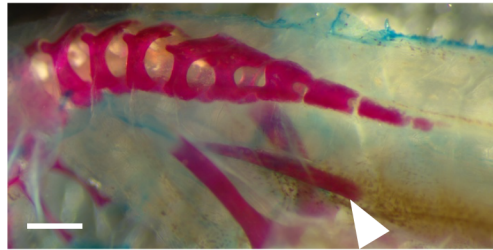

**Supplemental figure 2.  $TR\alpha^{-/-}TR\beta^{-/-}$  tadpoles have premature and increased hypochord ossification at stage 58.**

Representative photo of Alizarin red (for ossification) and Alcian blue (for cartilages) whole mount staining of  $TR\alpha^{+/+}TR\beta^{+/+}$  tadpoles (A) stage 58, (B) stage 62 and (C) stage 63; and a  $TR\alpha^{-/-}TR\beta^{-/-}$  tadpole at stage 58. Arrowheads: hypochord. Double-arrowheads: Notochord. Bars: 1 mm.
