# Supplementary material
Source: PubMed Central journal article supplement (PMC7047119)
Supplement: Supp_TableS1.pdf [file Supp_TableS1.pdf]

**Supplemental Table 1. Primers used in *Xenopus tropicalis* thyroid hormone receptor  $\beta$  knockout experiments.**

---

| Name             | Primer sequence                                                                           |
|------------------|-------------------------------------------------------------------------------------------|
| CRISPR sgRNA     | 5'-TAATACGACTCACTATAGGGTACATACCCAGCT<br>ACTGTTTTAGAGCTAGAAATAGCAAG -3'                    |
| CRISPR-3' primer | 5'-AAAAGCACCGACTCGGTGCCACTTTTTCAAGTTGATAA<br>CGGACTAGCCTTATTTAACTTGCTATTTCTAGCTCTAAAAC-3' |
| Forward primer 1 | 5'- TCAATGGAACCCTTTGGAGCTG -3'                                                            |
| Forward primer 2 | 5'- GGACAACATTAGATCTTTCTTTCTTTG -3'                                                       |
| Reverse primer 1 | 5'- ACAGTTACAGGCATTTCCAGGC -3'                                                            |
| Reverse primer 2 | 5'- CACACCACGCATAGCTCATC -3'                                                              |

---
