# Supplementary material
Source: PubMed Central journal article supplement (PMC7047119)
Supplement: Supp_TableS2.pdf [file Supp_TableS2.pdf]

**Supplemental Table 2. Primers used for qRT-PCR.**

---

|                | Primer sequence                   |                               |
|----------------|-----------------------------------|-------------------------------|
| Gene           | Forward                           | Reverse                       |
| <i>TRβ</i>     | 5'- CTCTAGCAGCTGATGGTGGG -3'      | 5'- TGGGTTTTGTTTCCTGGTGCT -3' |
| <i>klf9</i>    | 5'- GGCACAGGTGTCCTTATGCT -3'      | 5'- AAGGGCGTTCACCTGTATGG -3'  |
| <i>TH/bzip</i> | 5'- CCAAGGGAAACGGGTGGCTT -3'      | 5'- GTGCCACCTCTGCGGAAAGT -3'  |
| <i>eflα</i>    | 5'- AAGAGGGATCTGGCAGCGG -3'       | 5'- AAGGACACCAGTCTCCACAC -3'  |
| <i>rpl8</i>    | 5'- AGAAGGTCATCTCATCTGCAAACAG -3' | 5'- CAATACGACCACCACCAGCAA -3' |
| <i>xlk</i>     | 5'- CACCCAGTTATGTGGAGCTG -3'      | 5'- GGAGCACTGTTTCCACTTCC -3'  |
| <i>xak-b</i>   | 5'- GCAGCATTAGACAACGCAGA -3'      | 5'- AGGGTCCACTCGCTCTCATA -3'  |
| <i>xak-c</i>   | 5'- TTGGAAAATGCCAAGATTCTC -3'     | 5'- AGGGCCAGCTCATTCTCATA -3'  |

---
